# Supplementary material for: Impact of 2017 ACC/AHA guidelines on prevalence of hypertension and eligibility for antihypertensive treatment in United States and China: nationally representative cross sectional study
Source: PubMed Central journal article supplement — BMJ. 2018 Jul 11;362:k2357. doi: 10.1136/bmj.k2357 (PMC6039831; doi:10.1136/bmj.k2357), 2018-07-11

Khera et al. “The Impact of 2017 ACC/AHA Guidelines on the Prevalence of Hypertension and Eligibility for Anti-Hypertensive Therapy in the United States and China”

**Online Supplement**

**Table of Contents**

| <b>Content</b>                | <b>First Page</b> |
|-------------------------------|-------------------|
| STROBE checklist              | 2                 |
| Supplementary figures A, B, C | 4                 |

## STROBE Statement—Checklist of items for *cross-sectional studies*

|                              | Item<br>No | Recommendation                                                                                                                                                                                                                        | Page<br>No |
|------------------------------|------------|---------------------------------------------------------------------------------------------------------------------------------------------------------------------------------------------------------------------------------------|------------|
| <b>Title and abstract</b>    | 1          | (a) Indicate the study's design with a commonly used term in the title or the abstract <input checked="" type="checkbox"/>                                                                                                            | 2          |
|                              |            | (b) Provide in the abstract an informative and balanced summary of what was done and what was found <input checked="" type="checkbox"/>                                                                                               | 2-3        |
| <b>Introduction</b>          |            |                                                                                                                                                                                                                                       |            |
| Background/rationale         | 2          | Explain the scientific background and rationale for the investigation being reported <input checked="" type="checkbox"/>                                                                                                              | 6          |
| Objectives                   | 3          | State specific objectives, including any prespecified hypotheses <input checked="" type="checkbox"/>                                                                                                                                  | 6          |
| <b>Methods</b>               |            |                                                                                                                                                                                                                                       |            |
| Study design                 | 4          | Present key elements of study design early in the paper <input checked="" type="checkbox"/>                                                                                                                                           | 6          |
| Setting                      | 5          | Describe the setting, locations, and relevant dates, including periods of recruitment, exposure, follow-up, and data collection <input checked="" type="checkbox"/>                                                                   | 6-7        |
| Participants                 | 6          | (a) Give the eligibility criteria, and the sources and methods of selection of participants <input checked="" type="checkbox"/>                                                                                                       | 6-7        |
| Variables                    | 7          | Clearly define all outcomes, exposures, predictors, potential confounders, and effect modifiers. Give diagnostic criteria, if applicable <input checked="" type="checkbox"/>                                                          | 7-8        |
| Data sources/<br>measurement | 8*         | For each variable of interest, give sources of data and details of methods of assessment (measurement). Describe comparability of assessment methods if there is more than one group <input checked="" type="checkbox"/>              | 7-8        |
| Bias                         | 9          | Describe any efforts to address potential sources of bias <input type="checkbox"/> N/A                                                                                                                                                | -          |
| Study size                   | 10         | Explain how the study size was arrived at <input type="checkbox"/> N/A                                                                                                                                                                | -          |
| Quantitative variables       | 11         | Explain how quantitative variables were handled in the analyses. If applicable, describe which groupings were chosen and why <input checked="" type="checkbox"/>                                                                      | 8-9        |
| Statistical methods          | 12         | (a) Describe all statistical methods, including those used to control for confounding <input checked="" type="checkbox"/>                                                                                                             | 8          |
|                              |            | (b) Describe any methods used to examine subgroups and interactions <input checked="" type="checkbox"/>                                                                                                                               | 8-9        |
|                              |            | (c) Explain how missing data were addressed <input checked="" type="checkbox"/>                                                                                                                                                       | 7          |
|                              |            | (d) If applicable, describe analytical methods taking account of sampling strategy <input checked="" type="checkbox"/>                                                                                                                | 9          |
|                              |            | (e) Describe any sensitivity analyses <input type="checkbox"/> N/A                                                                                                                                                                    | -          |
| <b>Results</b>               |            |                                                                                                                                                                                                                                       |            |
| Participants                 | 13*        | (a) Report numbers of individuals at each stage of study—eg numbers potentially eligible, examined for eligibility, confirmed eligible, included in the study, completing follow-up, and analysed <input checked="" type="checkbox"/> | 10-11      |
|                              |            | (b) Give reasons for non-participation at each stage <input type="checkbox"/> N/A                                                                                                                                                     | -          |
|                              |            | (c) Consider use of a flow diagram – <input type="checkbox"/> Reported in text                                                                                                                                                        | 10-11      |

|                          |     |                                                                                                                                                                                                                                           |       |
|--------------------------|-----|-------------------------------------------------------------------------------------------------------------------------------------------------------------------------------------------------------------------------------------------|-------|
| Descriptive data         | 14* | (a) Give characteristics of study participants (eg demographic, clinical, social) and information on exposures and potential confounders <input checked="" type="checkbox"/>                                                              | 23    |
|                          |     | (b) Indicate number of participants with missing data for each variable of interest <input checked="" type="checkbox"/>                                                                                                                   | 7     |
| Outcome data             | 15* | Report numbers of outcome events or summary measures <input checked="" type="checkbox"/><br><i>(the results of this study include numerical estimates in all sections)</i>                                                                | 10-13 |
| Main results             | 16  | (a) Give unadjusted estimates and, if applicable, confounder-adjusted estimates and their precision (eg, 95% confidence interval). Make clear which confounders were adjusted for and why they were included <input type="checkbox"/> N/A | -     |
|                          |     | (b) Report category boundaries when continuous variables were categorized <input type="checkbox"/> N/A                                                                                                                                    | -     |
|                          |     | (c) If relevant, consider translating estimates of relative risk into absolute risk for a meaningful time period <input type="checkbox"/> N/A                                                                                             | -     |
| Other analyses           | 17  | Report other analyses done—eg analyses of subgroups and interactions, and sensitivity analyses <input type="checkbox"/> N/A                                                                                                               | -     |
| <b>Discussion</b>        |     |                                                                                                                                                                                                                                           |       |
| Key results              | 18  | Summarise key results with reference to study objectives <input checked="" type="checkbox"/>                                                                                                                                              | 13-14 |
| Limitations              | 19  | Discuss limitations of the study, taking into account sources of potential bias or imprecision. Discuss both direction and magnitude of any potential bias <input checked="" type="checkbox"/>                                            | 16-17 |
| Interpretation           | 20  | Give a cautious overall interpretation of results considering objectives, limitations, multiplicity of analyses, results from similar studies, and other relevant evidence <input checked="" type="checkbox"/>                            | 17    |
| Generalisability         | 21  | Discuss the generalisability (external validity) of the study results <input checked="" type="checkbox"/>                                                                                                                                 | 17    |
| <b>Other information</b> |     |                                                                                                                                                                                                                                           |       |
| Funding                  | 22  | Give the source of funding and the role of the funders for the present study and, if applicable, for the original study on which the present article is based <input checked="" type="checkbox"/>                                         | 18    |

**Figure A:** Prevalence of hypertension among study participants in the US and China, based on 2014 evidence-based guidelines for the management of high blood pressure in adults developed by the panel members appointed to the eighth Joint National Committee (JNC-8) and the 2017 ACC/AHA hypertension guidelines in the US (NHANES) and in China (CHARLS), among those between 45 to 75 years of age. Data are shown stratified by age and sex.

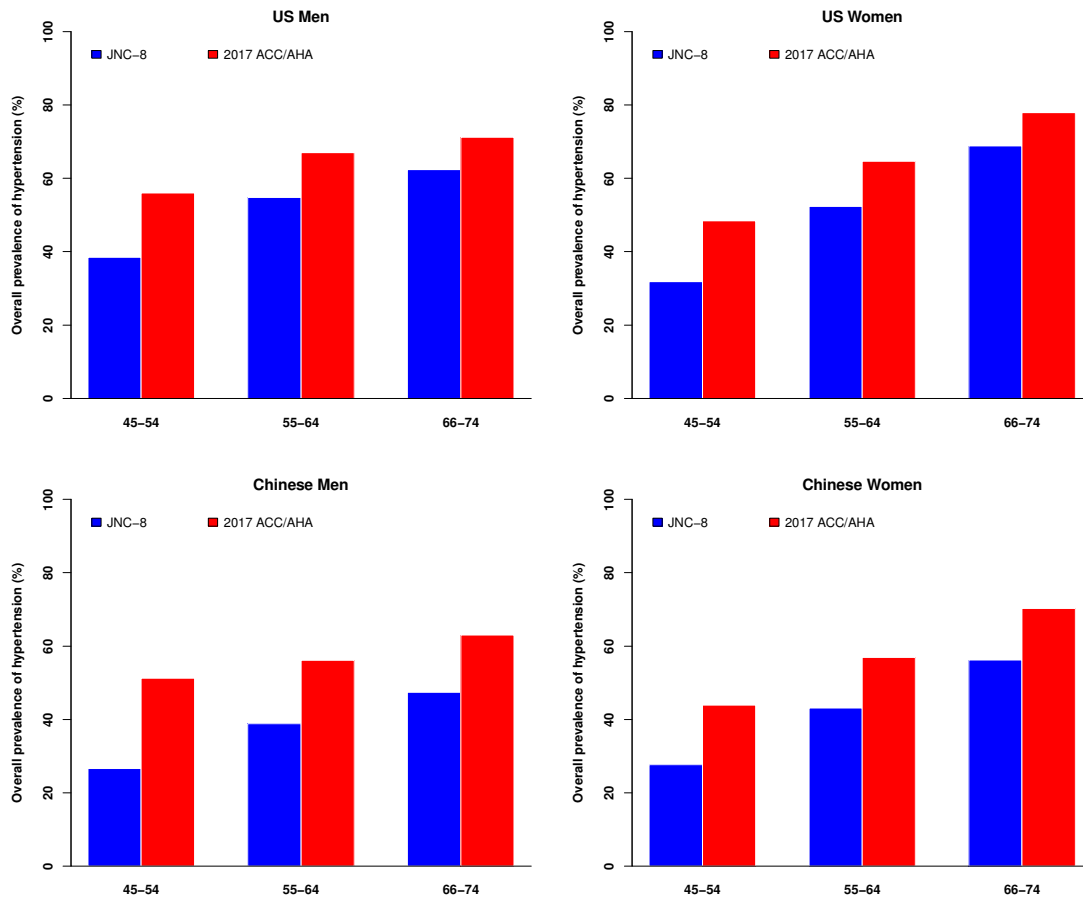

**Figure B:** Rate of non-treatment among study participants with hypertension in the US and China, based on 2014 evidence-based guidelines for the management of high blood pressure in adults developed by the panel members appointed to the eighth Joint National Committee (JNC-8) and the 2017 ACC/AHA hypertension guidelines in the US (NHANES) and in China (CHARLS), among those between 45 to 75 years of age. Data are shown stratified by age and sex.

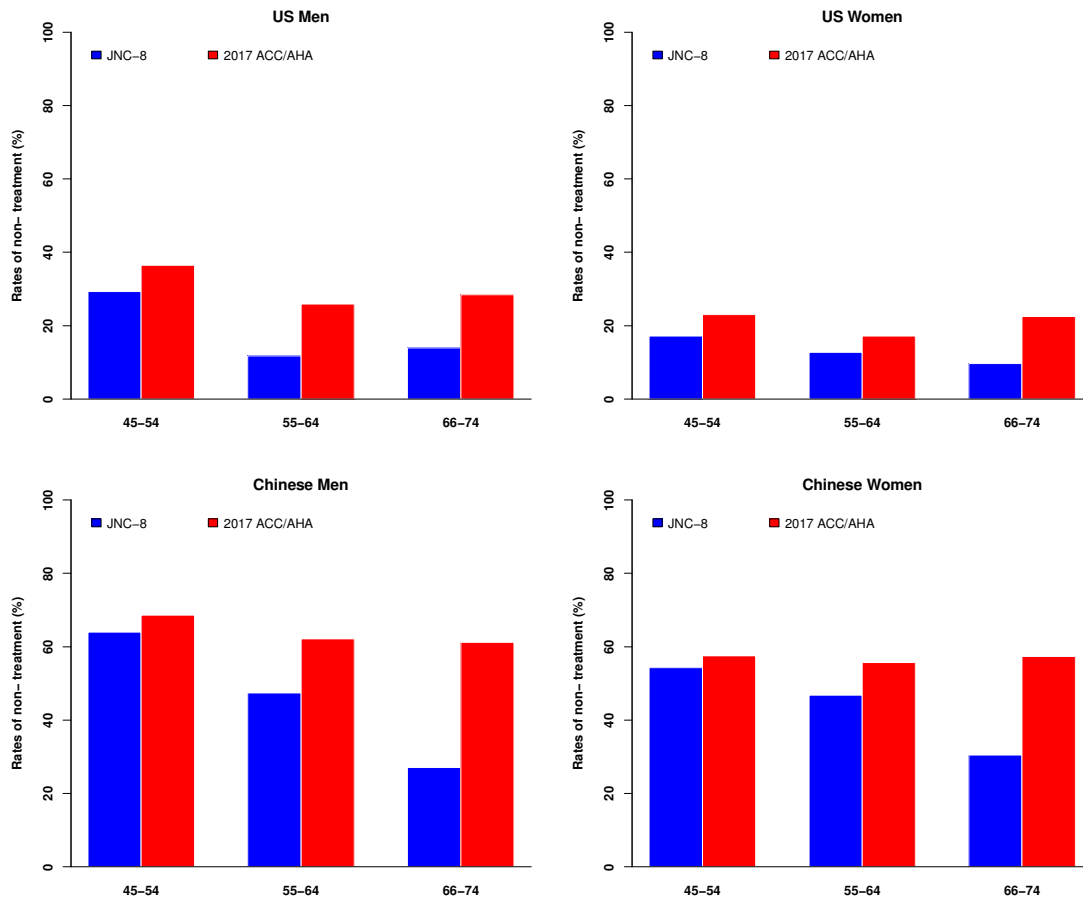

**Figure C:** Rate of under-treatment among study participants with hypertension in the US and China, based on 2014 evidence-based guidelines for the management of high blood pressure in adults developed by the panel members appointed to the eighth Joint National Committee (JNC-8) and the 2017 ACC/AHA hypertension guidelines in the US (NHANES) and in China (CHARLS). Data are shown stratified by age and sex.

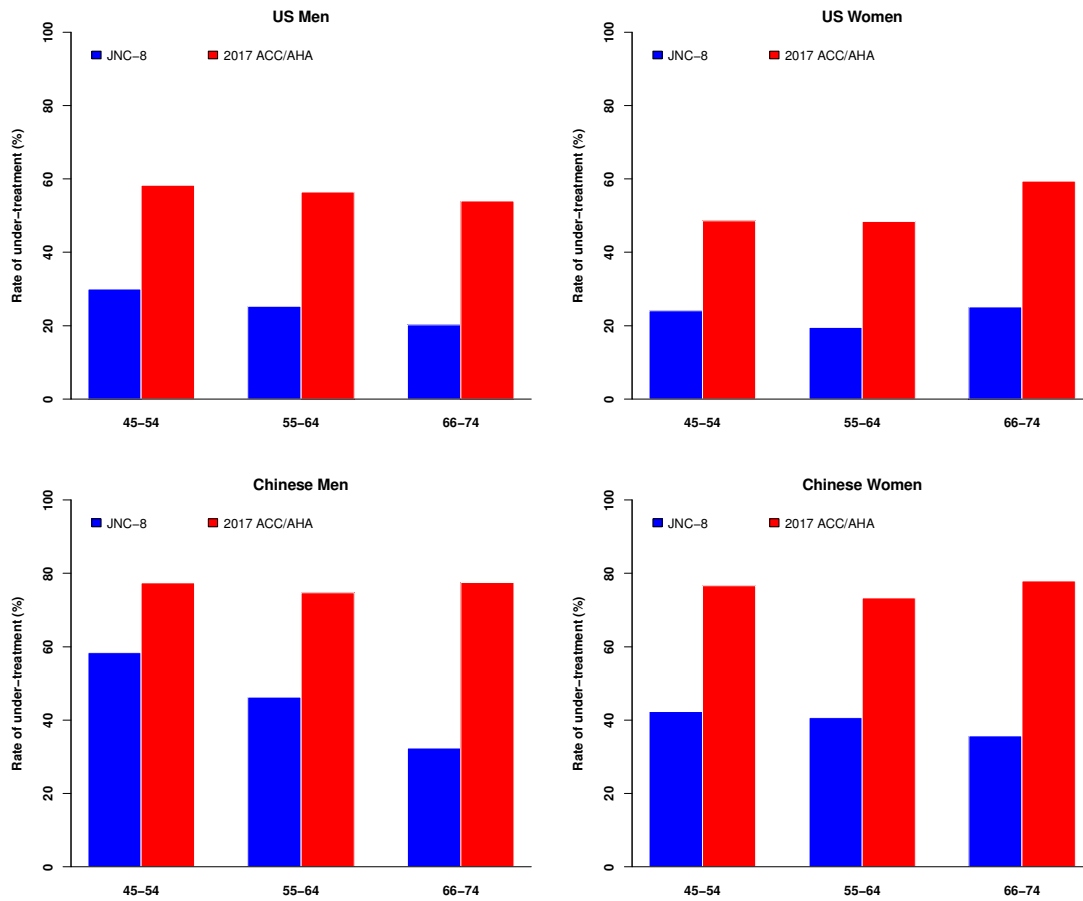

Supplement: kher042909.ww1.pdf [file kher042909.ww1.pdf]
